# Supplementary material for: Interfacial architectures based on a binary additive combination for high-performance Sn4P3 anodes in sodium-ion batteries
Source: Royal Society of Chemistry journal article supplement (doi:10.1039/c5ta00724k), 2015-01-01
Supplement: c5ta00724k1.pdf [file c5ta00724k1.pdf]

## Supplementary Information

### Interfacial architectures based on binary additive combination for high-performance $\text{Sn}_4\text{P}_3$ anodes in sodium-ion batteries

Jun Yeong Jang,<sup>a</sup> Yongwon Lee,<sup>a</sup> Youngjin Kim,<sup>b</sup> Jeongmin Lee,<sup>a</sup> Sang-Min Lee,<sup>c</sup>  
Kyu Tae Lee,<sup>\*b</sup> and Nam-Soon Choi<sup>\*a</sup>

<sup>a</sup> School of Energy and Chemical Engineering, Ulsan National Institute of Science and  
Technology (UNIST) 100 Banyeon-ri, Eonyang-eup, Ulju-gun, Ulsan, 689-798, South Korea  
E-mail: ktleee@unist.ac.kr and nschoi@unist.ac.kr

<sup>b</sup> School of Chemical and Biological Engineering, Seoul National University 599 Gwanangno,  
Gwanak-gu, Seoul 151-744, South Korea

<sup>c</sup> Battery Research Center, Korea Electrotechnology Research Institute, 12 Bulmosan-ro  
10 beon-gil, Changwon 642-120, South Korea

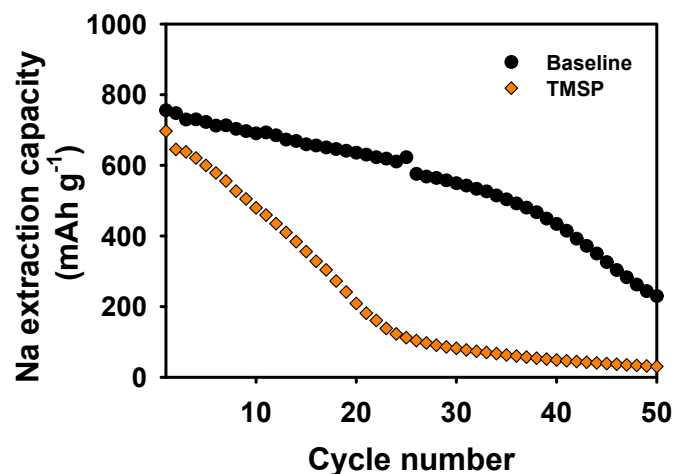

**Fig. S1.** Comparison of cycling performance of the  $\text{Sn}_4\text{P}_3$  anodes with and without TMSP additive at a rate of C/10.

**Table S1.** Impedance parameters obtained from the simulation

|          | $R_e$ ( $\Omega$ ) | $R_f$ ( $\Omega$ ) | $R_{ct}$ ( $\Omega$ ) | Total ( $\Omega$ ) |
|----------|--------------------|--------------------|-----------------------|--------------------|
| Baseline | 0.29               | 50.5               | 20                    | 71.79              |
| FEC      | 0.6                | 125                | 49                    | 174.6              |
| FEC+TMSP | 0.25               | 91                 | 14                    | 104.3              |
